# Supplementary material for: Secondary Aerosol Formation in Incense Burning Particles by Ozonolysis and Photochemical Oxidation
Source: Copernicus journal article supplement (doi:10.5194/acp-2022-838), 2022-12-19
Supplement: Supplementary file [file acp-2022-838-AC3-supplement.pdf]

# 1 Secondary Aerosol Formation in Incense Burning Particles by 2 Ozonolysis and Photochemical Oxidation via Single Particle Mixing 3 State Analysis

4 Zhancong Liang<sup>1,2</sup>, Liyuan Zhou<sup>1,2</sup>, Xinyue Li<sup>1</sup>, Rosemarie Ann Infante Cuevas<sup>1,2</sup>, Rongzhi Tang<sup>1,2</sup>, Mei  
5 Li<sup>3,4</sup>, Chunlei Cheng<sup>3,4</sup>, Yangxi Chu<sup>5</sup>, Patrick. K.H. Lee<sup>1</sup>, Alvin. C.K. Lai<sup>1</sup>, Chak K. Chan<sup>1,2,6\*</sup>

6  
7 <sup>1</sup> School of Energy and Environment, City University of Hong Kong, Hong Kong, China

8 <sup>2</sup> City University of Hong Kong Shenzhen Research Institute, Shenzhen, China

9 <sup>3</sup> Institute of Mass Spectrometry and Atmospheric Environment, Guangdong Provincial Engineering Research Center for On-  
10 line Source Apportionment System of Air Pollution, Jinan University, Guangzhou 510632, China

11 <sup>4</sup> Guangdong-Hongkong-Macau Joint Laboratory of Collaborative Innovation for Environmental Quality, Guangzhou 510632,  
12 China

13 <sup>5</sup> State Key Laboratory of Environmental Criteria and Risk Assessment, Chinese Research Academy of Environmental  
14 Sciences, Beijing, 100012, China

15 <sup>6</sup> Low-Carbon and Climate Impact Research Centre, City University of Hong Kong, Hong Kong, China

16

17 *Correspondence to:* Chak K. Chan ([chak.k.chan@cityu.edu.hk](mailto:chak.k.chan@cityu.edu.hk))

18 **Abstract.** Incense burning is a common religious activity that emits abundant gaseous and particulate pollutants into the  
19 atmosphere. During their atmospheric lifetime, these gases and particles are subjected to oxidation, leading to the formation  
20 of secondary pollutants. We examined the oxidation of incense burning plumes under O<sub>3</sub> exposure and dark condition using  
21 an oxidation flow reactor connected to a single particle aerosol mass spectrometer (SPAMS). Nitrate formation was observed  
22 in incense burning particles, mainly attributable to the ozonolysis of nitrogen-containing organic compounds. With UV on,  
23 nitrate formation was significantly enhanced, likely due to HNO<sub>3</sub>/HNO<sub>2</sub>/NO<sub>x</sub> uptake triggered by OH chemistry, which is  
24 more effective than ozone oxidation. The extent of nitrate formation is insensitive to O<sub>3</sub> and OH exposure, which can be  
25 explained by the diffusion limitation on interfacial uptake. The O<sub>3</sub>-UV-aged particles are more oxygenated and functionalized  
26 than O<sub>3</sub>-Dark-aged particles. Oxalate and malonate, two typical secondary organic aerosols (SOA), were found in O<sub>3</sub>-UV-aged  
27 particles. Our work reveals that nitrate, accompanied by SOA, can rapidly form in incense-burning particles upon  
28 photochemical oxidation in the atmosphere, which could deepen our understanding of air pollution caused by religious  
29 activities.

## 30 1 Introduction

31 Incense burning is a common religious ritual, especially in Asian and African communities (Ye et al., 2016; Khezri et al.,  
32 2015; Sidibe et al., 2022), with a massive amount of particles emitted (Lyu et al., 2021; See et al., 2011). The PM<sub>2.5</sub>  
33 concentration at a shrine area reached 6-8 times higher than usual during the Chinese New Year in Chiang Mai, Thailand,  
34 mainly due to incense burning (Bootdee et al., 2016). The particle emission factor (i.e., the mass ratio of the emitted particles

35 to the total material burnt) from incense burning could be up to 10 times higher than those from burning of various types of  
36 biomasses such as rice straw (Akagi et al., 2011; See et al., 2011; Goel et al., 2020).

37 Previous research mainly focused on the chemical compositions and potential health impacts of fresh incense particles (Li et  
38 al., 2012; Wang et al., 2006; Chuang et al., 2011; Lee et al., 2004). However, it was rarely considered that fresh particles would  
39 also be exposed to other atmospheric pollutants and light, which could initiate chemical reactions. The formation of secondary  
40 particulate pollutants could take place during the atmospheric aging of particles (Hodshire et al., 2019; Kumar et al., 2018;  
41 Rudich et al., 2007). For example, our recent work reveals rapid sulfate formation in fresh incense burning particles upon SO<sub>2</sub>  
42 exposure in the dark, and it can be accelerated under light (Liang et al., 2022). Sulfate formation in incense burning particles  
43 under dark and light was mainly attributed to gaseous oxidants and particulate photosensitizers, respectively.

44 Ozone and OH radicals are two of the most common oxidants in the atmosphere, contributing to secondary inorganic and  
45 organic aerosol formation (Volkamer et al., 2006; Kroll et al., 2006; Chen et al., 2011; Liu et al., 2019; Liu et al., 2018).  
46 Incense burning plume has been reported to contain various volatile organic compounds (VOCs) and NO<sub>x</sub> (Lee et al., 2004;  
47 Ho et al., 2002), in addition to particulate pollutants. Their interactions with ozone and OH radicals may lead to secondary  
48 aerosol formation. [For instance, ozone and OH oxidations of NO<sub>x</sub> were considered primary sources of particulate nitrate](#)  
49 [\(Seinfeld et al., 2008; Liang et al., 2021; Gen et al., 2022\)](#). Nevertheless, there is still a lack of understanding of the secondary  
50 aerosol formation in incense burning particles upon atmospheric aging of the plume, which could potentially worsen air quality,  
51 especially near areas of intense religious activities.

52 This study examines the secondary aerosol formation in fresh incense burning particles under ozone and OH exposure using a  
53 Gothenburg Potential Aerosol Mass (Go: PAM) flow reactor. We first characterized single fresh incense burning particles,  
54 followed by aged particles, with a single-particle aerosol mass spectrometer (SPAMS). Control experiments were performed  
55 to get insight into the possible secondary aerosol formation pathways and their significance. Then, we discussed nitrate  
56 formation as a function of particle size, ozone, and OH exposure. The fragmentation severely hinders the characterization of  
57 secondary organic aerosol (SOA). Nevertheless, -89[C<sub>2</sub>HO<sub>4</sub>] (oxalate) and -103[C<sub>3</sub>H<sub>3</sub>O<sub>4</sub>] (malonate), two commonly  
58 considered SOA(Cheng et al., 2017; Sullivan et al., 2007), were found.

## 59 **2 Experimental**

### 60 **2.1 Aging of incense-burning particles**

61 The schematic of the experimental set-up can be found in Figure S1. [In brief, we burnt an incense stick \(Figure S2, Kwok Tin](#)  
62 [Heung, Hong Kong\) in a 20 L glass burning bottle for each experiment. The air exchange rate per hour \(ACH\) is 0.3,](#)  
63 [comparable to the typical natural ventilation conditions \(Lee et al., 2004\). The relative humidity \(RH\) and the temperature](#)  
64 [inside the burning bottle were 56 ± 9 % RH and 22 ± 2.7 °C.](#) The burning was rapidly converted from flaming to smoldering

65 after ignition. A two-stage system diluted the emissions with an overall dilution of around 1600. Compressed air ( $\sim 0.1 \text{ L min}^{-1}$ )  
66  $)$  was used to introduce the diluted incense burning particles to the PAM reactor equipped with two UVC light tubes (30W,  
67 Philips TUV,  $\lambda_{\text{max}} = 254\text{nm}$ ). The spectrum of the lamp was shown in Supplementary information (Figure S3). In the control  
68 experiments, a charcoal absorber or HEPA filter was used to remove the gaseous pollutants or particles prior to the introduction  
69 to the Go:PAM. The data of these control experiments can be found in the supplementary information (Figure S4, S5). All  
70 these control experiments were aged experiments. The removal efficiency of NO<sub>x</sub>, VOCs, and particles were  $\sim 85\%$ ,  $\sim 90\%$ ,  
71 and  $\sim 100\%$ , respectively, determined by the concentration reduction after applying a HEPA filter or charcoal absorber at the  
72 exhaust of the burning bottle, using a NO<sub>x</sub> analyzer (T200, Teledyne) or a Total VOC analyzer (Yuante) (Figure S1). A  
73 controlled dry-wet mixed carrier flow of compressed air ( $\sim 4 \text{ L min}^{-1}$ ) and a flow of O<sub>3</sub> ( $\sim 0.1 \text{ L min}^{-1}$ ) generated by passing O<sub>2</sub>  
74 (99.995%, Linde) to an O<sub>3</sub> generator (Model 610, Jelight Company Inc, USA) were introduced into the Go:PAM. The  
75 compressed air was treated by a HEPA filter and a charcoal absorber prior to the experiment system. [O<sub>3</sub>] ranged from 300 to  
76 1500 ppb, equivalent to an atmospheric ozone exposure of 10-50 min, assuming ambient concentration of 60 ppb (Xia et al.,  
77 2021). The RH at the exit of the PAM was monitored by an RH sensor (M170, Vaisala, Finland). All the experiments were  
78 conducted at 80% RH and  $22 \pm 1.7 \text{ }^\circ\text{C}$ . The residence time in the Go:PAM was  $\sim 100 \text{ s}$ . The exhaust of the PAM was  
79 characterized by an O<sub>3</sub> analyzer (106L, 2B technology, USA), a water-based condensation particle counter (WCPC, Aerosol  
80 dynamics Inc, USA), and a SPAMS (Hexin Analytical Instrument Co., Ltd, China). Watne et al. suggested that the penetration  
81 of the particles is close to 100% for particles larger than 100 nm. Hence the wall loss is negligible for the 0.2-2  $\mu\text{m}$  particles  
82 that SPAMS measures. Besides, a control experiment measuring the total VOCs at the entrance and the exhaust of the Go:PAM  
83 suggested that the gas wall loss was also minor ( $6 \pm 4\%$ ). The particles passed through a diffusion dryer before entering the  
84 Go:PAM to reduce the matrix effects from water (Neubauer et al., 1998). The RH at the exhaust of the diffusion dryer was  
85  $\sim 15\%$ . The residence time of the particles in the dryer was estimated to be 5 s and the particle loss was  $\sim 4\%$  according to the  
86 CPC measurements. We also collected particles on 47 mm quartz filters (PALL, USA) at the exhaust of the Go:PAM reactor  
87 for offline mass and chemical analysis. The number of particles collected on the filters was estimated by the total WCPC  
88 counts during the sampling period. The particle number concentration from the WCPC was  $6100 \pm 2400 \text{ \# cm}^{-3}$  and the  
89 estimated number of collected particles was around  $10^8 \text{ \#}$ . The filter sample was extracted by deionized (DI) water for analyzing  
90 water-soluble ions (e.g., nitrate, formate, potassium) by Ion chromatography (IC) using the same protocol reported in our  
91 previous work (Liang et al., 2022). The total organic content (TOC) of the water-extract was analyzed by a TOC analyzer  
92 (Shimadzu TOC-L).

93

94 We studied the aging of the particles under 'UV', 'O<sub>3</sub> and dark', and 'O<sub>3</sub> and UV' in the PAM. We named these aged particles  
95 UV-aged, O<sub>3</sub>-Dark-aged, and O<sub>3</sub>-UV-aged, respectively. Although 254 nm is not atmospherically relevant, UV-aged particles  
96 are used as a reference in the discussions of the properties of O<sub>3</sub>-UV-aged particles. The OH exposure, equivalent to the product  
97 of gas-phase OH concentration and residence time, was determined by introducing a stream of SO<sub>2</sub> to the PAM for consuming  
98 OH radicals and monitoring the [SO<sub>2</sub>] decay, following a well-established approach in the literature (Kang et al., 2007). [SO<sub>2</sub>]

99 was almost constant under UV on but without O<sub>3</sub>, suggesting that the photochemistry of incense plume does not affect our  
100 estimation of OH exposure. The upper limit of OH exposure used in this study varied from  $1 \times 10^{10}$  to  $5 \times 10^{10}$  molecules cm<sup>-3</sup>  
101 s, equivalent to 2~10 hours of photochemical aging, assuming an ambient OH concentration of  $1.5 \times 10^6$  molecules cm<sup>-3</sup>  
102 (Mao et al., 2009).

## 103 2.2 SPAMS analysis

104 A detailed description of the SPAMS can be found in Li et al (Li et al., 2011). After the particle flow exits the PAM reactor,  
105 it first passes a PM<sub>2.5</sub> cyclone to avoid clogging before entering the SPAMS through a 0.1 mm critical orifice at 80 mL min<sup>-1</sup>  
106 flow. Particles achieved a terminal velocity in the supersonic expansion airflow and were detected and aerodynamically sized  
107 by two continuous diode Nd: YAG laser beams (532 nm). They were then ionized by a pulsed Nd: YAG laser (266 nm)  
108 triggered based on the velocity of a specific particle. The positive and negative ions produced were detected according to the  
109 different mass-to-charge ratios (m/z). The energy of the ionization laser was kept at ~0.6 mJ (Cheng et al., 2017). Spectra of  
110 more than 3000 individual particles collected for ~15 min were used for further analysis for each experiment. [The size accuracy](#)  
111 [of the instrument was routinely calibrated with polystyrene latex spheres of 0.2-2.5 μm diameter \(Nanosphere Size Standards,](#)  
112 [Duke Scientific Corp., Palo Alto\)](#). An adaptive resonance theory method (ART-2a) based on MATLAB was used to categorize  
113 the incense particles of similar SPAMS spectral characteristics into different particle groups (Phares et al., 2001). [In the ART-](#)  
114 [2a analysis, we used a vigilance factor of 0.85, and more than 98% of the particles were classified. Note that there is no general](#)  
115 [rule for the vigilance factor in ART-2a. Zhao et al. \(2008\) reported that both a small vigilance factor \(e.g., 0.5 or 0.6\) and a](#)  
116 [relatively high vigilance factor \(e.g., 0.8\) show very similar clustering accuracies \(± ~5%\) \(Zhao et al., 2008\).](#)

## 117 3 Results and discussions

### 118 3.1 Single-particle characteristics of incense burning particles

119 [The relative peak area \(RPA\), defined as the peak area of a specific peak divided by the total positive or negative mass spectral](#)  
120 [peak area, can reflect the relative abundance of particulate components \(Liang et al., 2022\). Note that RPA is not equivalent](#)  
121 [to concentration due to the matrix effect. Furthermore, control experiments using different laser fluences indicate that partial](#)  
122 [ablation was insignificant \(Table S1, will be discussed later\). The average spectra of the incense burning particles \(Figure 1a\)](#)  
123 [are similar to our previous work on incense burning at 50% RH \(Liang et al., 2022\). +39\[K\] dominates the positive spectra,](#)  
124 [and organic nitrogen \(ON\) peaks \(i.e., -26\[CN\] and -42\[CN\]\) from nitrogen-containing organics \(NOC\) dominate the](#)  
125 [negative spectra \(Zhang et al., 2020; Zhai et al., 2015; Zhang et al., 2021\). These features are also found in biomass burning](#)  
126 [particles \(Bi et al., 2011; Peng et al., 2019; Luo et al., 2020\). Despite that particulate polyaromatic hydrocarbons \(PAHs\) were](#)  
127 [found in a previous incense combustion study \(Ji et al., 2010\) and a recent study of ambient particles based on a single-particle](#)  
128 [mass spectrometer with ART-2a \(Passig et al., 2022\), none of the fresh incense burning particles in our experiments contained](#)

129 the PAHs peaks ( $m/z = 178, 189$  (fragment of alkylated phenanthrenes), 202, 220, 228, and 252). Regardless of the presence  
130 of PAHs or not, our conclusion on nitrate formation does not depend on the detection of specific chemicals such as PAHs.

131  
132 ART-2a categorizes fresh incense burning particles into K-ON, K-ONEC, K-Cl, and OC-ON. EC, Cl and OC are abbreviations  
133 of elemental carbon, chloride and organic carbon, respectively. Briefly, the "K" and "OC" before the hyphen indicate the  
134 characteristics of the positive spectra, while "ON", "ONEC" and "Cl" after the hyphen indicate the characteristics of the  
135 negative spectra. "K-" particles contain a dominant +39 peak and a small +41 peak attributed to isotopic potassium (Silva et  
136 al., 1999). On the other hand, the "OC-" particles are rich in typical organic fragments such as +27[C<sub>2</sub>H<sub>3</sub>] (Silva et al., 2000).  
137 According to the negative spectra, "-ON" particles have dominant ON signals. "-ONEC" particles have elemental carbon (EC)  
138 peaks of -12n[C<sub>n</sub><sup>-</sup>], with intensities comparable to typical ON peaks (Whiteaker et al., 2002). "-Cl" particles have prominent  
139 Cl<sup>-</sup> ( $m/z=-35, -37$ (isotopic)) and KCl<sub>2</sub><sup>-</sup> ( $m/z=-109, -111$ (isotopic)) peaks (Guazzotti et al., 2001; Dall'osto et al., 2004). The  
140 average spectra of each category can be found in Figure S6. There are slightly fewer K-ON particles and more K-ONEC  
141 particles observed at 80% RH (this work) than at 50% RH in Liang et al (Liang et al., 2022), probably due to the lower organic  
142 concentrations at higher RH to limit particle-phase partitioning of volatile organic compounds (Donaldson et al., 2006; Mcfall  
143 et al., 2020; Chan et al., 2011; Chan et al., 2010). Overall, the number fraction (NF) of each category is similar to our previous  
144 work, with a descending order of K-ON (47.3±5.2%) >> OC-ON (25.7±4.7%) ≈ K-ONEC (20.2±2.8%) > K-Cl (5.1±1.1%)  
145 (Figure 1c), reflecting the fresh incense burning particles are organic-rich (Li et al., 2012; Zhang et al., 2022).

### 146 3.2 Ozonolysis of the incense burning particles

147 Figure 1a also shows the average spectra of aged incense burning particles under 800 ppb O<sub>3</sub>. Qualitatively, the major peaks  
148 are similar to those in fresh incense burning particles, except for the rise of -62[NO<sub>3</sub><sup>-</sup>] and -46[NO<sub>2</sub><sup>-</sup>], which indicates the  
149 formation of nitrate and probably nitrite. The formation of organo-nitrate is not considered significant due to the decreased -  
150 26[CN] and -42[CNO].

151  
152 To compare the changes in the organic signals, we first excluded all inorganics and EC peaks (Table S2). Control experiments  
153 atomizing KNO<sub>3</sub> solution (as K<sup>+</sup> is the main inorganic cation found in incense burning particles) showed the RPA ratio of -  
154 16[O] to nitrate peaks is (6 ± 1.7) % due to fragmentation. Sulfate shows negligible fragmentation under our experimental  
155 conditions (Liang et al., 2022). Thus, we subtracted the RPA of -16[O] by 6% RPA of nitrate. Then, we recalculated the RPA  
156 of the organic peaks only, defined as "organic spectra". Figure 1b shows the differences in the organic spectra of the aged and  
157 fresh particles. The positive difference spectra show an RPA increase in the hydrocarbon +37[C<sub>3</sub>H] but an RPA decrease in  
158 +51[C<sub>4</sub>H<sub>3</sub>](Dall'osto et al., 2013). Besides, the increase of +28[CO], +42[C<sub>2</sub>H<sub>2</sub>O], and +43[C<sub>2</sub>H<sub>3</sub>O] indicates the formation of  
159 oxidized organics in the particles during ozonolysis. The negative difference spectra show a decrease in ON peaks, possibly  
160 due to the destruction of C-N bonds under ozonolysis, and an increase of -45[CHO<sub>2</sub>] formate peak.

161

162 NO<sub>2</sub> emitted by incense burning may hydrolyze in the incense burning particles to form nitrite and nitrate (2NO<sub>2</sub> + H<sub>2</sub>O =>  
163 HNO<sub>2</sub> + HNO<sub>3</sub>) (Finlayson-Pitts et al., 2003; Ramazan et al., 2006). The uptake of NO<sub>2</sub> is slow in deionized water ( $\gamma \approx 10^{-7}$ ),  
164 but it could be significantly promoted by chloride ( $\gamma \approx 10^{-3}$  in 1mM NaCl) (Enami et al., 2009; Yabushita et al., 2009), which  
165 is found as major inorganic anion in the incense burning particles. In addition, the reaction between NO<sub>2</sub> and O<sub>3</sub> produces NO<sub>3</sub>  
166 radicals, which could react with organics to form organo-nitrate (Ng et al., 2017). However, control experiments using a  
167 charcoal absorber to remove NO<sub>x</sub> only show ~20% decrease in RPA of total nitrate in O<sub>3</sub> aged particles (Figure S4), indicating  
168 that NO<sub>2</sub> hydrolysis and nitration may not be the main contributor to the nitrate formation. The charcoal absorber removes  
169 both NO<sub>x</sub> and VOC. However, it was not expected to be important in the observed nitrate RPA reduction, as the content of  
170 nitrogen-containing VOCs was minor in the incense burning plume, according to the literature (Manoukian et al., 2013). We  
171 categorized the O<sub>3</sub>-Dark-aged particles into 7 groups of K-ON, K-ONEC, K-ONN, K-N, K-Cl, OC-N, and OC-ON particles  
172 by ART-2a. The definitions of K-, OC-, -ON, -ONEC, -Cl are the same as before. -N particles show prominent nitrate peaks  
173 (-46[NO<sub>2</sub>] and -62[NO<sub>3</sub>]) in the negative spectra, while -ONN particles show comparable ON peaks and nitrate peaks (Figure  
174 S6). The NF of different categories descends in the order of K-ON (29.0±0.7%) ≈ K-ONEC (22.8±1.8%) ≈ OC-N (21.9±1.0%)  
175 > K-ONN (11.2±0.9%) > OC-ON (7.6±1.7%) > K-Cl (3.9±0.4%) > K-N (2.5±0.5%) (Figure 1c). Interestingly, the K-ONEC  
176 and K-Cl NFs are similar before and after aging, whereas the K-ON NF decreased, and the decrease is comparable to the sum  
177 of the K-ONN and K-N NF increases. OC-ON was the only fresh OC- particle type, but OC-N was dominant after aging. A  
178 control experiment with a HEPA filter before the Go:PAM showed no detectable particles by SPAMS. Thus, we assume the  
179 total SPAMS-detectable particle number was constant before and after aging, and O<sub>3</sub>-aging may have preferentially converted  
180 some -ON type particles to nitrate-containing particles (i.e., -ONN, -N). It has been reported that the HEPA filter would cause  
181 the loss of semi-volatile VOC (SVOC) or less-volatile VOC (LVOC) (Schilling, 1997). However, the addition of the charcoal  
182 to remove VOCs at the exhaust only caused ~6 % reduction of the NF of -ON type particles and nitrate-containing particles  
183 (i.e., -ONN, -N), suggesting the roles of SVOC and LVOC were minor to our conclusion. Besides, O<sub>3</sub>-Dark-aged particles  
184 have lower ON (i.e., the sum of -26[CN] and -42[CNO]) absolute peak area (APA) and higher total nitrate APA (i.e., -46[NO<sub>2</sub>]  
185 and -62[NO<sub>3</sub>]), than fresh particles (Figure S7). We considered -46[NO<sub>2</sub>] mainly as a nitrate fragment but not nitrite since the  
186 IC-measured [NO<sub>2</sub><sup>-</sup>]/[NO<sub>3</sub><sup>-</sup>] in the water-extract of collected particles was very low (~0.01) (Figure S8). We used APA here  
187 because it reflects the total abundance of ions and would not affect the analysis of other ions (Spencer et al., 2006). The  
188 formation of nitrate would increase the total peak area and decrease the RPA of other peaks, even the APA of others kept  
189 constant. Figure S9 also shows a positive correlation between the total nitrate RPA and formate RPA in the aged particles.  
190 Based on offline IC analysis, the water-extract of O<sub>3</sub>-Dark-aged particles has higher [Formate]/[K<sup>+</sup>] and [NO<sub>3</sub><sup>-</sup>]/[K<sup>+</sup>] in than  
191 fresh particles (Figure S10), assuming that K<sup>+</sup> is not reactive and used as an internal standard (Figure S11). Taking these  
192 altogether, nitrate and formate likely formed together, preferentially on K-ON and OC-ON particles. Ozonolysis of NOC has  
193 been reported to generate nitrate and formate (Sharma et al., 2010; Yao et al., 2020).



### 194 3.3 Photochemical oxidation of incense burning particles

195 With UV (254nm) on, the 800 ppb O<sub>3</sub> was partly photolyzed to generate OH radicals in the presence of water vapor, resulting  
196 in an OH exposure of  $\sim 3 \times 10^{10}$  molecules cm<sup>-3</sup> s, equivalent to a photochemical age of  $\sim 5$  h. We will use xx ppb O<sub>3</sub> (initial  
197 concentration) +UV, instead of OH exposure, to describe OH aging. The average spectra of O<sub>3</sub>-UV-aged particles are generally  
198 similar to that of O<sub>3</sub>-Dark-aged particles, with potassium and nitrate peaks dominating the positive and negative spectra,  
199 respectively (Figure 1a). However, the RPA of -46[NO<sub>2</sub>] and -62[NO<sub>3</sub>] were 0.2 and 0.4, around 2 times higher than O<sub>3</sub>-Dark-  
200 aged particles, likely indicating more nitrate formation. As will be discussed later, photochemistry triggered by light-absorbing  
201 compounds such as photosensitizers and Fe salts is a possible source of nitrate formation in O<sub>3</sub>-UV-aged particles.<sup>51-53</sup>  
202 However, its contribution is considered minor compared with OH chemistry since UV-aged particles only show a total nitrate  
203 RPA of 0.05, much lower than that of O<sub>3</sub>-UV-aged particles ( $\sim 0.7$ , will be discussed later). Control experiments using a  
204 charcoal absorber to remove the NO<sub>x</sub> significantly reduced the RPA of total nitrate by  $\sim 75\%$  (Figure S4). These suggest that  
205 OH chemistry involving NO<sub>x</sub> dominated the particulate nitrate formation under OH exposure. Under 800 ppb O<sub>3</sub> and UV, the  
206  $\sim 90\%$  reduction of [NO<sub>x</sub>] with a simultaneous increase in total nitrate peaks under UV suggests the oxidation of NO<sub>x</sub> by OH  
207 radicals to form HNO<sub>2</sub> and HNO<sub>3</sub>, which can be uptake by the particles afterward (Finlayson-Pitts et al., 1999). Reactive  
208 uptake of NO<sub>x</sub> initiated by OH chemistry cannot be excluded.

209

210 Similar to the O<sub>3</sub>-Dark-aged particles, O<sub>3</sub>-UV-aged particles show decreases in ON and other organic peaks (+38[C<sub>3</sub>H<sub>2</sub>],  
211 +50[C<sub>4</sub>H<sub>2</sub>], and +51[C<sub>4</sub>H<sub>3</sub>]) in the difference organic averaged spectra (Silva et al., 2000), likely due to oxidative consumption  
212 by OH radicals (Figure 1b). The ON peaks decrease in O<sub>3</sub>-UV-aged particles was more significant than in O<sub>3</sub>-Dark-aged  
213 particles, whereas the increase in formate peak is less obvious. These indicate that NOCs can also be effectively degraded via  
214 OH oxidation. Using the commonly used general markers of oxidized/aged organics in single-particle mass spectrometric  
215 studies of -16[O], -17[OH], +42[C<sub>2</sub>H<sub>2</sub>O], and +43[C<sub>2</sub>H<sub>3</sub>O] as examples (Taiwo et al., 2014; Denkenberger et al., 2007; Qin et  
216 al., 2006), the RPA increase in O<sub>3</sub>-UV-aged particles are 18, 10, 3, and 17 times higher than in O<sub>3</sub>-Dark-aged particles. This  
217 suggests that OH aging produced more oxidized products than O<sub>3</sub> aging. The difference average organic spectra of UV-aged  
218 particles almost showed no noticeable peaks, indicating that the chemistry initiated by particulate photoactive compounds may  
219 not be essential to the transformation of the organics (Figure S12).

220

221 The O<sub>3</sub>-UV-aged particles can be categorized into K-ONN, K-N, and OC-N, and they generally have more intense nitrate  
222 peaks than O<sub>3</sub>-Dark-aged particles. Still, "-ONN" particles have comparable ON and nitrate peaks, and "-N" particles have  
223 dominant nitrate peaks in the negative spectra (Figure S6). The NF descends in the order of OC-N ( $35.7 \pm 7.2\%$ )  $\approx$  K-N  
224 ( $35.5 \pm 4.2\%$ )  $>$  K-ONN ( $25.7 \pm 2.1\%$ ) (Figure 1c). Notably, the NF of OC- particles of O<sub>3</sub>-UV-aged particles is 50% larger than  
225 the fresh particles, likely due to the formation of additional particulate organics. We could not identify any preferential nitrate  
226 formation in specific particle types since most of the particles have high RPA of nitrate. [The collection efficiency of SPAMS](#)

227 increased from ~1% at 200 nm to ~40% at 960 nm (Figure S13). Therefore, secondary aerosol formation in small particles  
228 may have been underestimated. However, this would not affect the conclusion of the results that nitrate formed in incense  
229 burning particles upon O<sub>3</sub>+Dark and O<sub>3</sub>+UV aging. A control experiment doubling the laser fluence from 0.6 to 1.2 mJ showed  
230 minor differences in the classification of the aged particles and the RPA of total nitrate peaks (Table S1). This suggested that  
231 the partial ablation due to the formation of nitrate coating is not significant. It is possible that there were some pure secondary  
232 organic particles still not ionized at 1.2 mJ, which resulted in an underestimation of secondary organic aerosol formation.

### 233 **3.4 The formation of secondary nitrate**

234 Figure 2a shows the RPA of nitrate peaks under UV and different exposure of O<sub>3</sub> and OH. Since fresh particles also have high  
235 NF of total nitrate, NF cannot accurately depict the effectiveness of nitrate formation. Fresh incense burning particles exhibit  
236 very low RPA of total nitrate, whereas exposure to O<sub>3</sub> increases the RPA from almost 0 to around 0.2, irrespective of the [O<sub>3</sub>].  
237 Only a slight increase (~0.02) in total nitrate RPA was observed for UV-aged particles. However, with both O<sub>3</sub> and UV on,  
238 the RPAs of total nitrate further increased to above 0.7, which is also independent of the initial [O<sub>3</sub>]. Consistent with the  
239 average spectra shown before, nitrate formation due to OH oxidation is likely more efficient than that by ozonolysis. Under  
240 both O<sub>3</sub> and OH exposure, the summed APA of nitrate peaks increased as particle size increased, suggesting possibly a larger  
241 total amount of nitrate formed in larger particles (Figure 2b, d). However, the RPA shows an opposite trend, which can be  
242 interpreted as lower nitrate concentration in larger particles. Larger particles have larger surfaces but smaller surface-to-volume  
243 ratios, which lead to a larger absolute amount of nitrate formed but a lower relative concentration of particulate nitrate (Figure  
244 2c, e). It has been reported that the larger organic and inorganic mixed particles could undergo liquid-liquid phase separation  
245 (LLPS) more easily than smaller ones (Kucinski et al., 2019). It is possible that the organics are mainly located at the outer  
246 layers of the particles, whereas the inorganic components reside in the core. The hydrophobic organic shell may have retarded  
247 the uptake of HNO<sub>3</sub>/HNO<sub>2</sub>/NO<sub>x</sub> to form nitrate. Under O<sub>3</sub>+UV, it is also possible that comparable HNO<sub>3</sub> was generated under  
248 excess [OH] and contributed to the similar total nitrate RPA since the [NO<sub>x</sub>] reductions under different OH exposure are  
249 similarly high (Figure S14). The insensitivity of nitrate formation to O<sub>3</sub> and OH exposure can be potentially explained by the  
250 diffusion limitation of interfacial uptake due to the poor hygroscopicity of fresh incense burning particles (Li et al., 1993;  
251 Zaveri et al., 2018; Slade et al., 2014; Liang et al., 2022).

### 252 **3.5 The Potential formation of SOA**

253 Oxalate and malonate are two major dicarboxylates in atmospheric particles and are considered SOA (Yao et al., 2002). They  
254 have been widely studied using single-particle mass spectrometry with well-validated detection efficiency, without severe  
255 complications in mass spectra due to fragmentations (Cheng et al., 2017; Sullivan et al., 2007). Figure 3a shows the NF ratio  
256 (aged particles to fresh particles) of oxalate and malonate. We used the NF ratio rather than the APA or RPA to avoid large  
257 uncertainties in organic abundance due to the much weaker peaks of organics in the spectra, which was potentially due to the



258 matrix effects. The APA threshold for oxalate or malonate was 15 arbitrary unit (a.u.) with a baseline of zero unit, the same as  
259 that adopted in an ambient study (Zhu et al., 2020).

260

261 Compared to 300 ppb O<sub>3</sub> and UV, the NF ratios of malonate and oxalate were 30 and 9 folds higher, at 1500 ppb O<sub>3</sub> and UV,  
262 respectively. This trend is different from the independence of nitrate formation on OH exposure, probably because the  
263 formation of SOA was slower than nitrate via multiphase uptake. These NFs are lower estimates due to the possible degradation  
264 by photolysis of Fe-decarboxylate complexes to CO<sub>2</sub> (Gen et al., 2021). While the TOC ratio at different O<sub>3</sub>+UV which  
265 indicates the formation of SOA, shows an overall trend similar to the NF ratios of oxalate and malonate (Figure S15), the TOC  
266 ratio was 1.2-7.1 folds higher than the NF ratios of oxalate and malonate. However, this could be due to the formation of many  
267 other species as well as the matrix effects. SOA formation during aging of incense burning plume should be further assessed  
268 by other quantitative online instruments in future work. In contrast, no oxalate and malonate were observed during ozonolysis,  
269 irrespective of [O<sub>3</sub>]. It is likely the SOA characteristics and precursors are different under O<sub>3</sub> and OH. Hence, we are  
270 conservative and use the term “potential”, even though oxalate and malonate are commonly found highly oxidized SOA. The  
271 TOC ratio of aged to fresh particles extract was higher upon OH oxidation than O<sub>3</sub> oxidation (Figure S16). Furthermore, UV-  
272 aged particles did not show an NF increase of both, indicating that the oxalate and malonate formation were mainly due to OH  
273 radicals, rather than oxidants from particulate photoactive compounds or ozone. The control experiment with a charcoal  
274 absorber shows around 60% and 70% NF reduction of oxalate and malonate, suggesting that the precursors are mainly in the  
275 gas phase (Figure S5). The size distribution of oxalate and malonate containing particles skewed towards the larger sizes,  
276 supporting their nature of secondary formation (i.e., oxidized gaseous precursors were added to the particles that cause size  
277 increase, Figure S17). Figure 3b shows the NF of oxalate and malonate in different categories of the particles. The particles in  
278 the replicated experiments under the same OH exposure were combined to compensate for the low particle concentrations.  
279 The error bars show one standard deviation among different OH exposures. In descending order, the NF of oxalate and  
280 malonate was K-N > K-ONN > OC-N. The mass hygroscopic grow factor (i.e., the mass ratio of wet particles to dry particles)  
281 of inorganic potassium salts KNO<sub>3</sub> and KCl at 80% RH are around 1.6 and 2.2 based on AIOMFAC model predictions (Text  
282 S1, <https://aiomfac.lab.mcgill.ca/about.html> (Zuend et al., 2008)), much higher than that in the water extract of biomass  
283 burning particles (1.1-1.4, including both lab-generated and ambient collected) (Rissler et al., 2006; Carrico et al., 2008; Chan  
284 et al., 2005), as well as fresh incense burning particles (around 1) (Liang et al., 2022), which are organic-rich. The likely higher  
285 fraction of hygroscopic inorganic of inorganic fraction allows K-N and K-ONN to retain more liquid water to dissolve gaseous  
286 SOA precursors for oxalate and malonate formation. The difference of oxalate and malonate NF is statistically significantly  
287 different between K-N and OC-N (i.e., P < 0.05 in ANOVA test). There are many other changes in the NF of organic fragments,  
288 which suggest the oxidation of primary organics and the formation of SOA. However, further analysis was limited by the lack  
289 of molecular information after severe fragmentation. The major spectral evolution and possible peak attribution can be found  
290 in Text S2.

## 291 4 Conclusions

292 In this work, we report the single-particle mixing state characteristics of incense burning particles upon ozonolysis and  
293 photochemical oxidation. Formation of secondary aerosol including nitrate and organics was found. This indicates that besides  
294 the significant primary emission of particles, additional particulate pollutants could be formed upon atmospheric aging, further  
295 worsening the air quality in both outdoor and indoor environments. Nitrate formation initiated by O<sub>3</sub> is generally considered  
296 to involve the so-called N<sub>2</sub>O<sub>5</sub> pathway, in which oxidation of NO<sub>x</sub> forms NO<sub>3</sub> radical and then N<sub>2</sub>O<sub>5</sub>, which hydrolyzes to  
297 form particulate nitrate (Zhao et al., 2021; Xiao et al., 2020). In our study, nitrate formation was found, as indicated by the  
298 increase of total nitrate RPA from near 0 to around 0.2, upon O<sub>3</sub> exposure. We propose that ozonolysis of NOCs may be a  
299 potential pathway for nitrate formation, in addition to the N<sub>2</sub>O<sub>5</sub> pathway. With UV on, ozone was photolyzed to form OH  
300 radicals, and we observed a significant increase in total nitrate RPA to above 0.7 at 300 ppb O<sub>3</sub> or above. Nitrate formation in  
301 O<sub>3</sub>-UV-aged particles is more prominent than in O<sub>3</sub>-Dark-aged particles and is attributed to multiphase OH oxidation involving  
302 NO<sub>x</sub>, such as HNO<sub>3</sub>/HNO<sub>2</sub>/NO<sub>x</sub> uptake (Chen et al., 2020; Lu et al., 2019). At 300 ppb O<sub>3</sub> and UV in this study, the equivalent  
303 OH and O<sub>3</sub> exposure time of the incense particles is estimated to be ~2 h and ~10 min, respectively, assuming daytime OH  
304 and O<sub>3</sub> concentration of  $1.5 \times 10^6$  molecules cm<sup>-3</sup> and 60 ppb (Xia et al., 2021; Mao et al., 2009). Despite the differences in  
305 the estimated exposure time for OH and O<sub>3</sub>, nitrate formation in incense particles under sunlight can be efficient.

306

307 We also observed various changes in organics peaks, though less apparent than nitrate in the average spectra. Overall,  
308 oxygenated fragments like +42[C<sub>2</sub>H<sub>2</sub>O] increase, which indicates functionalization of the organics upon oxidation. The  
309 increase of such oxygenated fragments is more significant in O<sub>3</sub>-UV-aged than O<sub>3</sub>-Dark-aged particles. -26[CN] and -42[CNO]  
310 attributed to NOC decreased under O<sub>3</sub> and OH exposure. Apparent formate formation was observed in O<sub>3</sub>-Dark-aged particles,  
311 likely from the degradation of NOC. Production of formate in O<sub>3</sub>-UV-aged particles was less significant than that in O<sub>3</sub>-Dark-  
312 aged particles, attributed to the photolysis of O<sub>3</sub>. Oxalate and malonate were observed in O<sub>3</sub>-UV-aged particles but not in O<sub>3</sub>-  
313 Dark-aged particles, and the NFs increased with OH exposure. Furthermore, oxalate and malonate preferentially formed on K-  
314 N particles, followed by K-ONN and then OC-N, indicating a potentially crucial role of aerosol liquid water in SOA formation.

315

316 Though the molecular characterization of SOA is beyond the focus of this work, the formation of oxalate and malonate shed  
317 light on the SOA formation upon photochemical oxidation of the incense burning plumes. Formate and dicarboxylates are  
318 important hygroscopic organics in atmospheric particles, which can potentially act as cloud condensation nuclei (Yao et al.,  
319 2002; Peng et al., 2001). Incense burning particles were often used as biomass burning particle surrogates (Li et al., 2012;  
320 Schurman et al., 2017; Zhang et al., 2014; Kuwata et al., 2017), due to their similar physicochemical properties and overall  
321 composition (Li et al., 2012; Zhang et al., 2022). Our work sheds light on the secondary aerosol formation in biomass burning  
322 particles upon exposure of atmospheric oxidants, despite that the detailed composition of incense burning plume may be  
323 different from biomass burning plume because of the manufacturing process of incense sticks. For instance, incense burning

324 sticks may contain additives such as adhesives beyond biomass constituents (Lin et al., 2007). Future works are encouraged to  
 325 explore the formation mechanism and kinetics of secondary pollutants in the incense burning and biomass burning particles.  
 326 Due to the short residence time in a PAM reactor, assumption in the interchangeability of oxidant concentration and reaction  
 327 time in estimating total exposure was made. However, Chu et al. (2019) challenged such interchangeability in ozonolysis  
 328 reaction of linoleic acid (Chu et al., 2019). Aging at ambient concentrations of oxidants should also be investigated.  
 329  
 330

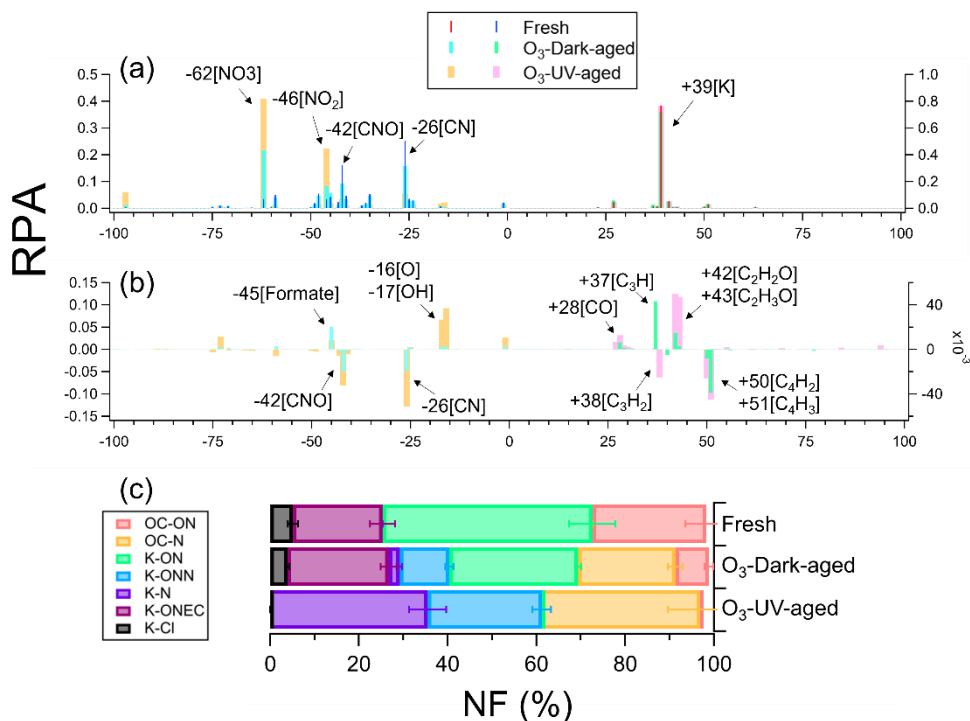

331  
 332 **Figure 1.** (a) The average spectra of fresh and aged incense burning particles at 800 ppb O<sub>3</sub>(+UV); (b) The difference (aged  
 333 minus fresh) of the average organic spectra of incense burning particles at 800 ppb O<sub>3</sub>(+UV). The left axis and right axis are  
 334 for negative spectra and positive spectra, respectively. (c) Number fraction of different categories in fresh, O<sub>3</sub>-Dark-aged, and  
 335 O<sub>3</sub>-UV-aged particles.  
 336

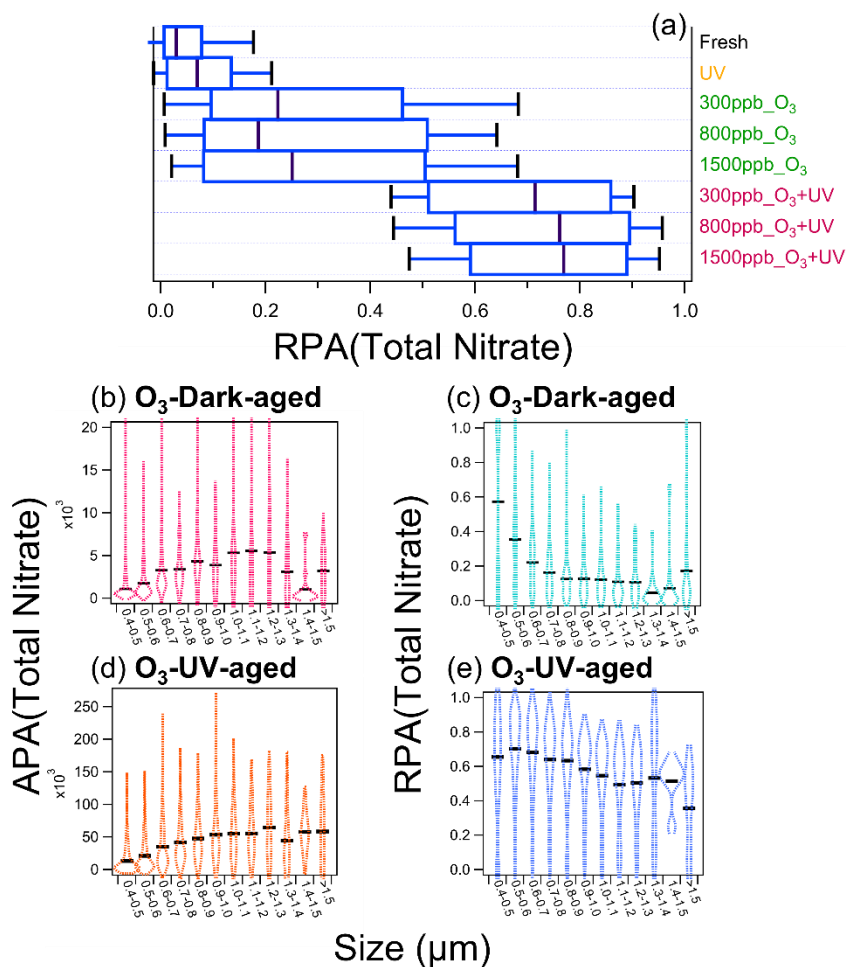

337

338 **Figure 2.** (a) The whisker-box plot of total nitrate RPA of fresh and aged particles. The violin plots of (b, d) APA and (c, e)  
 339 RPA of total nitrate in O<sub>3</sub>- and O<sub>3</sub>-UV-aged particles as a function of size (unit: μm) of particles aged at 1500 ppb O<sub>3</sub> (+ UV).  
 340 The medians are shown as the lines, and the kernel densities represent the probability density of the data at different values.

341

342

343

344

345

346

347

348

349

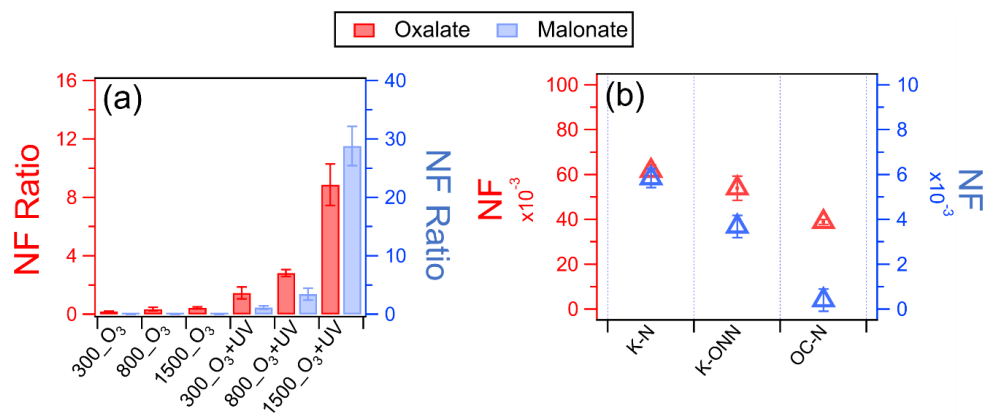

351

352 **Figure 3.** (a) The NF ratios of oxalate and malonate under different conditions. 300\_O<sub>3</sub> denotes aging at 300 ppb O<sub>3</sub>; (b) The  
 353 NF of oxalate (left axis) and malonate (right axis) in different categories of aged particles.

354

355

356 *Data availability.* The supplement provides additional figures and tables.

357

358 *Competing interests.* The contact author has declared that neither they nor their co-authors have any competing interests.

359 Financial support.

360

361 *Acknowledgment.* We gratefully acknowledge the support from the Key-Area Research and Development Program of  
 362 Guangdong Province (2020B1111360001), the Hong Kong Research Grants Council (No.11304121, R1016-20F), the National  
 363 Natural Science Foundation of China (No. 42275104, 41905122).

364

## 365 References

366 Akagi, S. K., Yokelson, R. J., Wiedinmyer, C., Alvarado, M. J., Reid, J. S., Karl, T., Crouse, J. D., and Wennberg, P. O.:  
 367 Emission factors for open and domestic biomass burning for use in atmospheric models, *Atmos. Chem. Phys.*, 11, 4039-4072,  
 368 10.5194/acp-11-4039-2011, 2011.

369 Bi, X., Zhang, G., Li, L., Wang, X., Li, M., Sheng, G., Fu, J., and Zhou, Z.: Mixing state of biomass burning particles by single  
 370 particle aerosol mass spectrometer in the urban area of PRD, China, *Atmospheric Environment*, 45, 3447-3453,  
 371 <https://doi.org/10.1016/j.atmosenv.2011.03.034>, 2011.

372 Bootdee, S., Chantara, S., and Prapamontol, T.: Determination of PM<sub>2.5</sub> and polycyclic aromatic hydrocarbons from incense  
373 burning emission at shrine for health risk assessment, *Atmospheric Pollution Research*, 7, 680-689,  
374 <https://doi.org/10.1016/j.apr.2016.03.002>, 2016.

375 Carrico, C. M., Petters, M. D., Kreidenweis, S. M., Collett Jr., J. L., Engling, G., and Malm, W. C.: Aerosol hygroscopicity  
376 and cloud droplet activation of extracts of filters from biomass burning experiments, *Journal of Geophysical Research:*  
377 *Atmospheres*, 113, <https://doi.org/10.1029/2007JD009274>, 2008.

378 Chan, L. P. and Chan, C. K.: Enhanced Reactive Uptake of Nonanal by Acidic Aerosols in the Presence of Particle-Phase  
379 Organics, *Aerosol Science and Technology*, 45, 872-883, 10.1080/02786826.2011.567314, 2011.

380 Chan, L. P., Lee, A. K. Y., and Chan, C. K.: Gas-Particle Partitioning of Alcohol Vapors on Organic Aerosols, *Environmental*  
381 *Science & Technology*, 44, 257-262, 10.1021/es9018018, 2010.

382 Chan, M. N., Choi, M. Y., Ng, N. L., and Chan, C. K.: Hygroscopicity of Water-Soluble Organic Compounds in Atmospheric  
383 Aerosols: Amino Acids and Biomass Burning Derived Organic Species, *Environmental Science & Technology*, 39, 1555-  
384 1562, 10.1021/es049584l, 2005.

385 Chen, X., Hopke, P. K., and Carter, W. P.: Secondary organic aerosol from ozonolysis of biogenic volatile organic compounds:  
386 chamber studies of particle and reactive oxygen species formation, *Environmental science & technology*, 45, 276-282, 2011.

387 Chen, X., Wang, H., Lu, K., Li, C., Zhai, T., Tan, Z., Ma, X., Yang, X., Liu, Y., Chen, S., Dong, H., Li, X., Wu, Z., Hu, M.,  
388 Zeng, L., and Zhang, Y.: Field Determination of Nitrate Formation Pathway in Winter Beijing, *Environmental Science &*  
389 *Technology*, 54, 9243-9253, 10.1021/acs.est.0c00972, 2020.

390 Cheng, C., Li, M., Chan, C. K., Tong, H., Chen, C., Chen, D., Wu, D., Li, L., Wu, C., and Cheng, P.: Mixing state of oxalic  
391 acid containing particles in the rural area of Pearl River Delta, China: implications for the formation mechanism of oxalic acid,  
392 *Atmospheric Chemistry and Physics*, 17, 9519-9533, 2017.

393 Chu, Y., Cheng, T. F., Gen, M., Chan, C. K., Lee, A. K., and Chan, M. N.: Effect of ozone concentration and relative humidity  
394 on the heterogeneous oxidation of linoleic acid particles by ozone: an insight into the interchangeability of ozone concentration  
395 and time, *ACS Earth and Space Chemistry*, 3, 779-788, 2019.

396 Chuang, H.-C., Jones, T., Chen, Y., Bell, J., Wenger, J., and Bérubé, K.: Characterisation of airborne particles and associated  
397 organic components produced from incense burning, *Analytical and bioanalytical chemistry*, 401, 3095-3102, 2011.



398 Dall'Osto, M., Beddows, D. C. S., Kinnersley, R. P., Harrison, R. M., Donovan, R. J., and Heal, M. R.: Characterization of  
399 individual airborne particles by using aerosol time-of-flight mass spectrometry at Mace Head, Ireland, *Journal of Geophysical*  
400 *Research: Atmospheres*, 109, <https://doi.org/10.1029/2004JD004747>, 2004.

401 Dall'Osto, M., Ovadnevaite, J., Ceburnis, D., Martin, D., Healy, R. M., O'Connor, I. P., Kourtchev, I., Sodeau, J. R., Wenger,  
402 J. C., and O'Dowd, C.: Characterization of urban aerosol in Cork city (Ireland) using aerosol mass spectrometry, *Atmospheric*  
403 *Chemistry and Physics*, 13, 4997-5015, 2013.

404 Denkenberger, K. A., Moffet, R. C., Holecek, J. C., Rebotier, T. P., and Prather, K. A.: Real-time, single-particle measurements  
405 of oligomers in aged ambient aerosol particles, *Environmental Science & Technology*, 41, 5439-5446, 2007.

406 Donaldson, D. J. and Vaida, V.: The Influence of Organic Films at the Air–Aqueous Boundary on Atmospheric Processes,  
407 *Chemical Reviews*, 106, 1445-1461, 10.1021/cr040367c, 2006.

408 Enami, S., Hoffmann, M. R., and Colussi, A.: Absorption of inhaled NO<sub>2</sub>, *The Journal of Physical Chemistry B*, 113, 7977-  
409 7981, 2009.

410 Finlayson-Pitts, B., Wingen, L., Sumner, A., Syomin, D., and Ramazan, K.: The heterogeneous hydrolysis of NO<sub>2</sub> in  
411 laboratory systems and in outdoor and indoor atmospheres: An integrated mechanism, *Physical Chemistry Chemical Physics*,  
412 5, 223-242, 2003.

413 Finlayson-Pitts, B. J. and Pitts Jr, J. N.: *Chemistry of the upper and lower atmosphere: theory, experiments, and applications*,  
414 Elsevier1999.

415 Gen, M., Zhang, R., and Chan, C. K.: Nitrite/Nitrous Acid Generation from the Reaction of Nitrate and Fe(II) Promoted by  
416 Photolysis of Iron–Organic Complexes, *Environmental Science & Technology*, 55, 15715-15723, 10.1021/acs.est.1c05641,  
417 2021.

418 Gen, M., Liang, Z., Zhang, R., Go Mabato, B. R., and Chan, C. K.: Particulate nitrate photolysis in the atmosphere,  
419 *Environmental Science: Atmospheres*, 10.1039/D1EA00087J, 2022.

420 Goel, A., Mundra, R., and Ola, D.: Examination of Particle Characteristics and Quantification of Emission Factors for Smoke  
421 Generated from a Popular Indian Incense Burnt in an Experimental Chamber, in: *Indoor Environmental Quality*, Springer, 77-  
422 84, 2020.

423 Guazzotti, S. A., Coffee, K. R., and Prather, K. A.: Continuous measurements of size-resolved particle chemistry during  
424 INDOEX-Intensive Field Phase 99, *Journal of Geophysical Research: Atmospheres*, 106, 28607-28627,  
425 <https://doi.org/10.1029/2001JD900099>, 2001.

426 Ho, S. S. H. and Yu, J. Z.: Concentrations of formaldehyde and other carbonyls in environments affected by incense burning,  
427 *Journal of Environmental Monitoring*, 4, 728-733, 10.1039/B200998F, 2002.

428 Hodshire, A. L., Akherati, A., Alvarado, M. J., Brown-Steiner, B., Jathar, S. H., Jimenez, J. L., Kreidenweis, S. M., Lonsdale,  
429 C. R., Onasch, T. B., and Ortega, A. M.: Aging effects on biomass burning aerosol mass and composition: A critical review  
430 of field and laboratory studies, *Environmental science & technology*, 53, 10007-10022, 2019.

431 Ji, X., Le Bihan, O., Ramalho, O., Mandin, C., D'Anna, B., Martinon, L., Nicolas, M., Bard, D., and Pairon, J.-C.:  
432 Characterization of particles emitted by incense burning in an experimental house, *Indoor Air*, 20, 147-158,  
433 <https://doi.org/10.1111/j.1600-0668.2009.00634.x>, 2010.

434 Kang, E., Root, M., Toohey, D., and Brune, W.: Introducing the concept of potential aerosol mass (PAM), *Atmospheric  
435 Chemistry and Physics*, 7, 5727-5744, 2007.

436 Khezri, B., Chan, Y. Y., Tiong, L. Y. D., and Webster, R. D.: Annual air pollution caused by the Hungry Ghost Festival,  
437 *Environmental Science: Processes & Impacts*, 17, 1578-1586, 10.1039/C5EM00312A, 2015.

438 Kroll, J. H., Ng, N. L., Murphy, S. M., Flagan, R. C., and Seinfeld, J. H.: Secondary organic aerosol formation from isoprene  
439 photooxidation, *Environmental science & technology*, 40, 1869-1877, 2006.

440 Kucinski, T. M., Dawson, J. N., and Freedman, M. A.: Size-Dependent Liquid-Liquid Phase Separation in Atmospherically  
441 Relevant Complex Systems, *The Journal of Physical Chemistry Letters*, 10, 6915-6920, 2019.

442 Kumar, N. K., Corbin, J. C., Bruns, E. A., Massabó, D., Slowik, J. G., Drinovec, L., Močnik, G., Prati, P., Vlachou, A., and  
443 Baltensperger, U.: Production of particulate brown carbon during atmospheric aging of residential wood-burning emissions,  
444 *Atmospheric Chemistry and Physics*, 18, 17843-17861, 2018.

445 Kuwata, M. and Lee, W.-C.: 1-octanol-water partitioning as a classifier of water soluble organic matters: Implication for  
446 solubility distribution, *Aerosol Science and Technology*, 51, 602-613, 10.1080/02786826.2017.1283004, 2017.

447 Lee, S.-C. and Wang, B.: Characteristics of emissions of air pollutants from burning of incense in a large environmental  
448 chamber, *Atmospheric Environment*, 38, 941-951, <https://doi.org/10.1016/j.atmosenv.2003.11.002>, 2004.

449 Li, L., Huang, Z., Dong, J., Li, M., Gao, W., Nian, H., Fu, Z., Zhang, G., Bi, X., Cheng, P., and Zhou, Z.: Real time bipolar  
450 time-of-flight mass spectrometer for analyzing single aerosol particles, *International Journal of Mass Spectrometry*, 303, 118-  
451 124, <https://doi.org/10.1016/j.ijms.2011.01.017>, 2011.

452 Li, W. and Hopke, P. K.: Initial Size Distributions and Hygroscopicity of Indoor Combustion Aerosol Particles, *Aerosol*  
453 *Science and Technology*, 19, 305-316, 10.1080/02786829308959638, 1993.

454 Li, Y. J., Yeung, J. W. T., Leung, T. P. I., Lau, A. P. S., and Chan, C. K.: Characterization of Organic Particles from Incense  
455 Burning Using an Aerodyne High-Resolution Time-of-Flight Aerosol Mass Spectrometer, *Aerosol Science and Technology*,  
456 46, 654-665, 10.1080/02786826.2011.653017, 2012.

457 Liang, Z., Zhang, R., Gen, M., Chu, Y., and Chan, C. K.: Nitrate Photolysis in Mixed Sucrose–Nitrate–Sulfate Particles at  
458 Different Relative Humidities, *The Journal of Physical Chemistry A*, 125, 3739-3747, 10.1021/acs.jpca.1c00669, 2021.

459 Liang, Z., Zhou, L., Infante Cuevas, R. A., Li, X., Cheng, C., Li, M., Tang, R., Zhang, R., Lee, P. K. H., Lai, A. C. K., and  
460 Chan, C. K.: Sulfate Formation in Incense Burning Particles: A Single-Particle Mass Spectrometric Study, *Environmental*  
461 *Science & Technology Letters*, 9, 718-725, 10.1021/acs.estlett.2c00492, 2022.

462 Lin, T.-C., Yang, C.-R., and Chang, F.-H.: Burning characteristics and emission products related to metallic content in incense,  
463 *Journal of hazardous materials*, 140, 165-172, 2007.

464 Liu, T., Wang, Z., Huang, D. D., Wang, X., and Chan, C. K.: Significant Production of Secondary Organic Aerosol from  
465 Emissions of Heated Cooking Oils, *Environmental Science & Technology Letters*, 5, 32-37, 10.1021/acs.estlett.7b00530,  
466 2018.

467 Liu, T., Zhou, L., Liu, Q., Lee, B. P., Yao, D., Lu, H., Lyu, X., Guo, H., and Chan, C. K.: Secondary Organic Aerosol Formation  
468 from Urban Roadside Air in Hong Kong, *Environmental Science & Technology*, 53, 3001-3009, 10.1021/acs.est.8b06587,  
469 2019.

470 Lu, K., Fuchs, H., Hofzumahaus, A., Tan, Z., Wang, H., Zhang, L., Schmitt, S. H., Rohrer, F., Bohn, B., Broch, S., Dong, H.,  
471 Gkatzelis, G. I., Hohaus, T., Holland, F., Li, X., Liu, Y., Liu, Y., Ma, X., Novelli, A., Schlag, P., Shao, M., Wu, Y., Wu, Z.,  
472 Zeng, L., Hu, M., Kiendler-Scharr, A., Wahner, A., and Zhang, Y.: Fast Photochemistry in Wintertime Haze: Consequences  
473 for Pollution Mitigation Strategies, *Environ Sci Technol*, 53, 10676-10684, 10.1021/acs.est.9b02422, 2019.

474 Luo, J., Zhang, J., Huang, X., Liu, Q., Luo, B., Zhang, W., Rao, Z., and Yu, Y.: Characteristics, evolution, and regional  
475 differences of biomass burning particles in the Sichuan Basin, China, *Journal of Environmental Sciences*, 89, 35-46,  
476 <https://doi.org/10.1016/j.jes.2019.09.015>, 2020.

477 Lyu, X., Huo, Y., Yang, J., Yao, D., Li, K., Lu, H., Zeren, Y., and Guo, H.: Real-time molecular characterization of air  
478 pollutants in a Hong Kong residence: Implication of indoor source emissions and heterogeneous chemistry, *Indoor Air*, 31,  
479 1340-1352, <https://doi.org/10.1111/ina.12826>, 2021.

480 Manoukian, A., Quivet, E., Temime-Roussel, B., Nicolas, M., Maupetit, F., and Wortham, H.: Emission characteristics of air  
481 pollutants from incense and candle burning in indoor atmospheres, *Environmental Science and Pollution Research*, 20, 4659-  
482 4670, 10.1007/s11356-012-1394-y, 2013.

483 Mao, J., Ren, X., Brune, W., Olson, J., Crawford, J., Fried, A., Huey, L., Cohen, R., Heikes, B., and Singh, H.: Airborne  
484 measurement of OH reactivity during INTEX-B, *Atmospheric Chemistry and Physics*, 9, 163-173, 2009.

485 McFall, A. S., Johnson, A. W., and Anastasio, C.: Air–water partitioning of biomass-burning phenols and the effects of  
486 temperature and salinity, *Environmental Science & Technology*, 54, 3823-3830, 2020.

487 Neubauer, K. R., Johnston, M. V., and Wexler, A. S.: Humidity effects on the mass spectra of single aerosol particles,  
488 *Atmospheric Environment*, 32, 2521-2529, 1998.

489 Ng, N. L., Brown, S. S., Archibald, A. T., Atlas, E., Cohen, R. C., Crowley, J. N., Day, D. A., Donahue, N. M., Fry, J. L., and  
490 Fuchs, H.: Nitrate radicals and biogenic volatile organic compounds: oxidation, mechanisms, and organic aerosol, *Atmospheric*  
491 *chemistry and physics*, 17, 2103-2162, 2017.

492 Passig, J., Schade, J., Irsig, R., Kröger-Badge, T., Czech, H., Adam, T., Fallgren, H., Moldanova, J., Sklorz, M., and Streibel,  
493 T.: Single-particle characterization of polycyclic aromatic hydrocarbons in background air in northern Europe, *Atmospheric*  
494 *Chemistry and Physics*, 22, 1495-1514, 2022.

495 Peng, C. and Chan, C. K.: The water cycles of water-soluble organic salts of atmospheric importance, *Atmospheric*  
496 *Environment*, 35, 1183-1192, 2001.

497 Peng, X., Liu, X., Shi, X., Shi, G., Li, M., Liu, J., Huangfu, Y., Xu, H., Ma, R., Wang, W., and Feng, Y.: Source apportionment  
498 using receptor model based on aerosol mass spectra and 1 h resolution chemical dataset in Tianjin, China, *Atmospheric*  
499 *Environment*, 198, 387-397, <https://doi.org/10.1016/j.atmosenv.2018.11.018>, 2019.

500 Phares, D. J., Rhoads, K. P., Wexler, A. S., Kane, D. B., and Johnston, M. V.: Application of the ART-2a algorithm to laser  
501 ablation aerosol mass spectrometry of particle standards, *Analytical Chemistry*, 73, 2338-2344, 2001.

502 Qin, X. and Prather, K. A.: Impact of biomass emissions on particle chemistry during the California Regional Particulate Air  
503 Quality Study, *International Journal of Mass Spectrometry*, 258, 142-150, <https://doi.org/10.1016/j.ijms.2006.09.004>, 2006.

504 Ramazan, K., Wingen, L. M., Miller, Y., Chaban, G. M., Gerber, R. B., Xantheas, S. S., and Finlayson-Pitts, B. J.: New  
505 experimental and theoretical approach to the heterogeneous hydrolysis of NO<sub>2</sub>: Key role of molecular nitric acid and its  
506 complexes, *The Journal of Physical Chemistry A*, 110, 6886-6897, 2006.

507 Rissler, J., Vestin, A., Swietlicki, E., Fisch, G., Zhou, J., Artaxo, P., and Andreae, M. O.: Size distribution and hygroscopic  
508 properties of aerosol particles from dry-season biomass burning in Amazonia, *Atmos. Chem. Phys.*, 6, 471-491, 10.5194/acp-  
509 6-471-2006, 2006.

510 Rudich, Y., Donahue, N. M., and Mentel, T. F.: Aging of organic aerosol: Bridging the gap between laboratory and field  
511 studies, *Annu. Rev. Phys. Chem.*, 58, 321-352, 2007.

512 Schilling, J. B.: Extraction of semivolatile organic compounds from high-efficiency particulate air (HEPA) filters by  
513 supercritical carbon dioxide, Argonne National Lab., Analytical Chemistry Lab., IL (United States), 1997.

514 Schurman, M. I., Kim, J. Y., Cheung, H. H., and Chan, C. K.: Atmospheric particle composition-hygroscopic growth  
515 measurements using an in-series hybrid tandem differential mobility analyzer and aerosol mass spectrometer, *Aerosol Science  
516 and Technology*, 51, 694-703, 2017.

517 See, S. W. and Balasubramanian, R.: Characterization of fine particle emissions from incense burning, *Building and  
518 Environment*, 46, 1074-1080, <https://doi.org/10.1016/j.buildenv.2010.11.006>, 2011.

519 Seinfeld, J. and Pandis, S.: *Atmospheric chemistry and physics*. 1997, New York, 2008.

520 Sharma, V. K. and Graham, N. J. D.: Oxidation of Amino Acids, Peptides and Proteins by Ozone: A Review, *Ozone: Science  
521 & Engineering*, 32, 81-90, 10.1080/01919510903510507, 2010.

522 Sidibe, A., Sakamoto, Y., Murano, K., Sato, K., Yuba, A., Futami, M., Koita, O. A., Traore, I., and Kajii, Y.: Chemical  
523 Characterization and Health Risk Assessment of Particulate Matter from Household Activities in Bamako, Mali, Western Sub-  
524 Saharan Africa, *Atmosphere*, 13, 1290, 2022.

525 Silva, P. J. and Prather, K. A.: Interpretation of Mass Spectra from Organic Compounds in Aerosol Time-of-Flight Mass  
526 Spectrometry, *Analytical Chemistry*, 72, 3553-3562, 10.1021/ac9910132, 2000.

527 Silva, P. J., Liu, D.-Y., Noble, C. A., and Prather, K. A.: Size and Chemical Characterization of Individual Particles Resulting  
528 from Biomass Burning of Local Southern California Species, *Environmental Science & Technology*, 33, 3068-3076,  
529 10.1021/es980544p, 1999.

530 Slade, J. H. and Knopf, D. A.: Multiphase OH oxidation kinetics of organic aerosol: The role of particle phase state and relative  
531 humidity, *Geophysical Research Letters*, 41, 5297-5306, 2014.

532 Spencer, M. T. and Prather, K. A.: Using ATOFMS to determine OC/EC mass fractions in particles, *Aerosol Science and*  
533 *Technology*, 40, 585-594, 2006.

534 Sullivan, R. C. and Prather, K. A.: Investigations of the diurnal cycle and mixing state of oxalic acid in individual particles in  
535 Asian aerosol outflow, *Environmental Science Technology*, 41, 8062-8069, 2007.

536 Taiwo, A. M., Harrison, R. M., Beddows, D. C., and Shi, Z.: Source apportionment of single particles sampled at the  
537 industrially polluted town of Port Talbot, United Kingdom by ATOFMS, *Atmospheric Environment*, 97, 155-165, 2014.

538 Volkamer, R., Jimenez, J. L., San Martini, F., Dzepina, K., Zhang, Q., Salcedo, D., Molina, L. T., Worsnop, D. R., and Molina,  
539 M. J.: Secondary organic aerosol formation from anthropogenic air pollution: Rapid and higher than expected, *Geophysical*  
540 *Research Letters*, 33, 2006.

541 Wang, B., Lee, S. C., and Ho, K. F.: Chemical composition of fine particles from incense burning in a large environmental  
542 chamber, *Atmospheric Environment*, 40, 7858-7868, <https://doi.org/10.1016/j.atmosenv.2006.07.041>, 2006.

543 Whiteaker, J. R., Suess, D. T., and Prather, K. A.: Effects of Meteorological Conditions on Aerosol Composition and Mixing  
544 State in Bakersfield, CA, *Environmental Science & Technology*, 36, 2345-2353, 10.1021/es011381z, 2002.

545 Xia, N., Du, E., Guo, Z., and de Vries, W.: The diurnal cycle of summer tropospheric ozone concentrations across Chinese  
546 cities: Spatial patterns and main drivers, *Environmental Pollution*, 286, 117547, <https://doi.org/10.1016/j.envpol.2021.117547>,  
547 2021.

548 Xiao, H. W., Zhu, R. G., Pan, Y. Y., Guo, W., Zheng, N. J., Liu, Y. H., Liu, C., Zhang, Z. Y., Wu, J. F., and Kang, C. A.:  
549 Differentiation between nitrate aerosol formation pathways in a southeast Chinese city by dual isotope and modeling studies,  
550 *Journal of Geophysical Research: Atmospheres*, 125, e2020JD032604, 2020.

551 Yabushita, A., Enami, S., Sakamoto, Y., Kawasaki, M., Hoffmann, M., and Colussi, A.: Anion-catalyzed dissolution of NO<sub>2</sub>  
552 on aqueous microdroplets, *The Journal of Physical Chemistry A*, 113, 4844-4848, 2009.

553 Yao, X., Fang, M., and Chan, C. K.: Size distributions and formation of dicarboxylic acids in atmospheric particles,  
554 *Atmospheric Environment*, 36, 2099-2107, 2002.



555 Yao, Y., Xie, Y., Zhao, B., Zhou, L., Shi, Y., Wang, Y., Sheng, Y., Zhao, H., Sun, J., and Cao, H.: N-dependent ozonation  
556 efficiency over nitrogen-containing heterocyclic contaminants: A combined density functional theory study on reaction  
557 kinetics and degradation pathways, *Chemical Engineering Journal*, 382, 122708, <https://doi.org/10.1016/j.cej.2019.122708>,  
558 2020.

559 Ye, C., Chen, R., and Chen, M.: The impacts of Chinese Nian culture on air pollution, *Journal of Cleaner Production*, 112,  
560 1740-1745, 2016.

561 Zaveri, R. A., Shilling, J. E., Zelenyuk, A., Liu, J., Bell, D. M., D'Ambro, E. L., Gaston, C. J., Thornton, J. A., Laskin, A., and  
562 Lin, P.: Growth kinetics and size distribution dynamics of viscous secondary organic aerosol, *Environmental science &*  
563 *technology*, 52, 1191-1199, 2018.

564 Zhai, J., Wang, X., Li, J., Xu, T., Chen, H., Yang, X., and Chen, J.: Thermal desorption single particle mass spectrometry of  
565 ambient aerosol in Shanghai, *Atmospheric Environment*, 123, 407-414, 2015.

566 Zhang, G., Lian, X., Fu, Y., Lin, Q., Li, L., Song, W., Wang, Z., Tang, M., Chen, D., Bi, X., Wang, X., and Sheng, G.: High  
567 secondary formation of nitrogen-containing organics (NOCs) and its possible link to oxidized organics and ammonium, *Atmos.*  
568 *Chem. Phys.*, 20, 1469-1481, 10.5194/acp-20-1469-2020, 2020.

569 Zhang, S., Wang, Z., Zhang, J., Guo, D., and Chen, Y.: Inhalable cigarette-burning particles: Size-resolved chemical  
570 composition and mixing state, *Environmental Research*, 202, 111790, 2021.

571 Zhang, X., Xu, J., Zhai, L., and Zhao, W.: Characterization of Aerosol Properties from the Burning Emissions of Typical  
572 Residential Fuels on the Tibetan Plateau, *Environmental Science & Technology*, 56, 14296-14305, 10.1021/acs.est.2c04211,  
573 2022.

574 Zhang, Y., Zhang, X., Sun, J., Hu, G., Shen, X., Wang, Y., Wang, T., Wang, D., and Zhao, Y.: Chemical composition and  
575 mass size distribution of PM 1 at an elevated site in central east China, *Atmospheric Chemistry and Physics*, 14, 12237-12249,  
576 2014.

577 Zhao, W., Hopke, P. K., and Prather, K. A.: Comparison of two cluster analysis methods using single particle mass spectra,  
578 *Atmospheric Environment*, 42, 881-892, <https://doi.org/10.1016/j.atmosenv.2007.10.024>, 2008.

579 Zhao, Z.-Y., Cao, F., Fan, M.-Y., Zhai, X.-Y., Yu, H.-R., Hong, Y., Ma, Y.-J., and Zhang, Y.-L.: Nitrate aerosol formation  
580 and source assessment in winter at different regions in Northeast China, *Atmospheric Environment*, 267, 118767, 2021.

581 Zhu, S., Li, L., Wang, S., Li, M., Liu, Y., Lu, X., Chen, H., Wang, L., Chen, J., Zhou, Z., Yang, X., and Wang, X.: Development  
582 of an automatic linear calibration method for high-resolution single-particle mass spectrometry: improved chemical species  
583 identification for atmospheric aerosols, *Atmos. Meas. Tech.*, 13, 4111-4121, 10.5194/amt-13-4111-2020, 2020.

584 Zuend, A., Marcolli, C., Luo, B. P., and Peter, T.: A thermodynamic model of mixed organic-inorganic aerosols to predict  
585 activity coefficients, *Atmos. Chem. Phys.*, 8, 4559-4593, 10.5194/acp-8-4559-2008, 2008.

586
